# Supplementary material for: A niche that triggers aggressiveness within BRCA1-IRIS overexpressing triple negative tumors is supported by reciprocal interactions with the microenvironment
Source: PubMed Central journal article supplement (PMC5732721; doi:10.18632/oncotarget.20892), 2017-09-14
Supplement: oncotarget-08-103182-s001.pdf [file oncotarget-08-103182-s001.pdf]

## A niche that triggers aggressiveness within BRCA1-IRIS overexpressing triple negative tumors is supported by reciprocal interactions with the microenvironment

### SUPPLEMENTARY MATERIALS

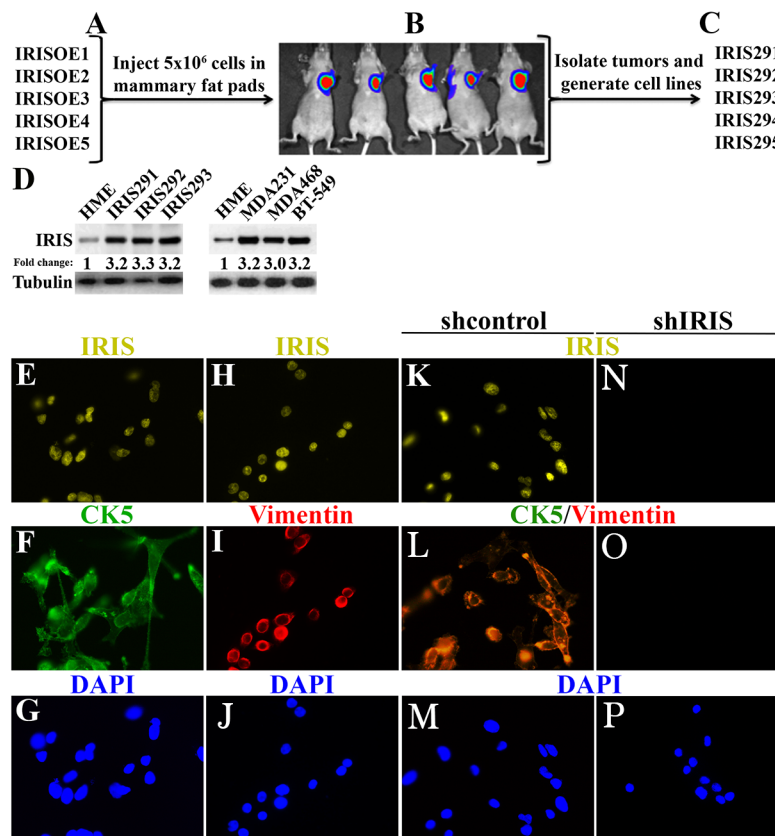

**Supplementary Figure 1: Stepwise generation of 1° orthotopic IRISOE mammary tumor cell lines.** Briefly, naïve HME cells Dox-inducibly overexpressing IRIS (5 clones IRISOE1-IRISOE5) were injected in SCID mice mammary fat pads (A). Three month later tumors developed (B) were resected and propagated in culture ((C), named IRIS291-IRIS295). (D) Expression of Dox-inducible IRIS in IRIS291, IRIS292, and IRIS293 (left) as compared to 3 TNBC cell lines (MDA-MB-231, MDA-MB-468, and BT-549). Note both are compared to IRIS level in naïve HME cells. Fluorescent staining of tumor cells dissociated from 1° IRISOE orthotopic mammary tumors (in the presence of Dox), with mouse anti-IRIS, guinea pig anti-CK5, and rabbit anti-vimentin. Goat anti-mouse Alexa Fluor 532, anti-guinea pig Alexa Fluor 488, and anti-rabbit Alexa Fluor 568 were used as 2° antibodies. Note expression of CK5 in every IRISOE tumor cells (E-G), vimentin in every IRISOE tumor cell (1H-1J), co-localization of CK5 and vimentin in every IRISOE tumor cell (1K-1M), and lack thereof in IRIS silenced cells “1N-P”.

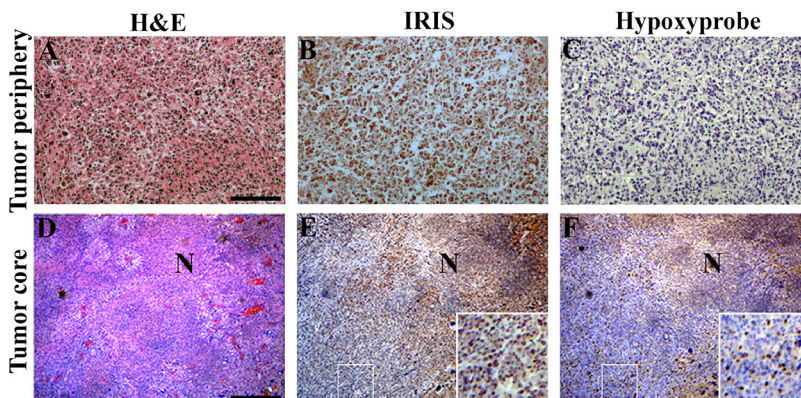

Supplementary Figure 2: Staining of IRISOE 1° orthotopic mammary tumor section of tumors' periphery or core showing prevalence of necrotic/hypoxic core (aggressiveness niche). (A and D) H&E, (B and E) staining mouse anti-IRIS antibody, and (C and F) hypoxyprobe staining. N: denotes the necrotic core within the tumor. Scale bars: 100µm in A-C, and 500µm in D-F.

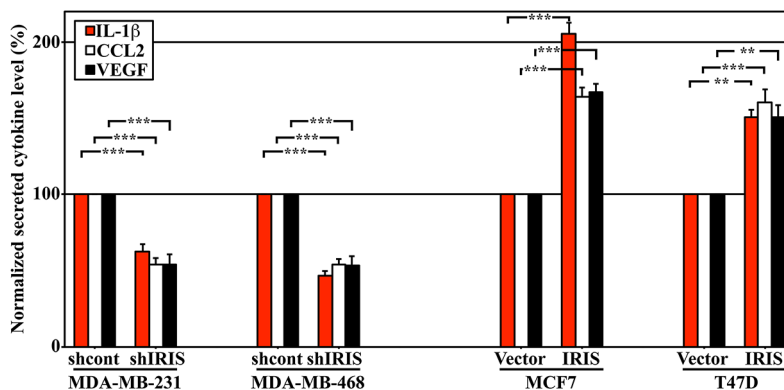

Supplementary Figure 3: Levels of IL-1β (red bars), CCL2 (white bars), and VEGF (black bars) secreted from the TNBC tumor cell lines; MDA-MB-231 and MDA-MB-468 expressing shcontrol or shIRIS, as well as from the luminal A/ERα<sup>+</sup> breast cancer cell lines: MCF7, T47D expressing vector or IRIS.

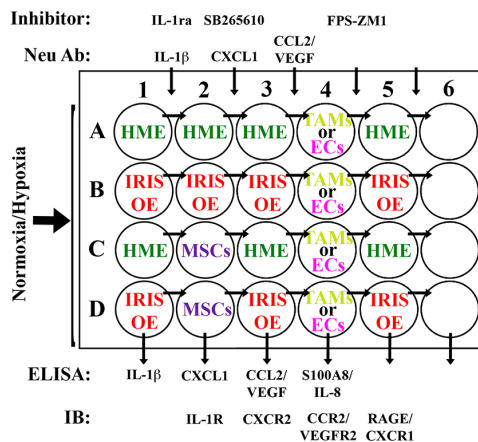

Supplementary Figure 4: Schematic representation of the *in vitro* experiments performed in this study.

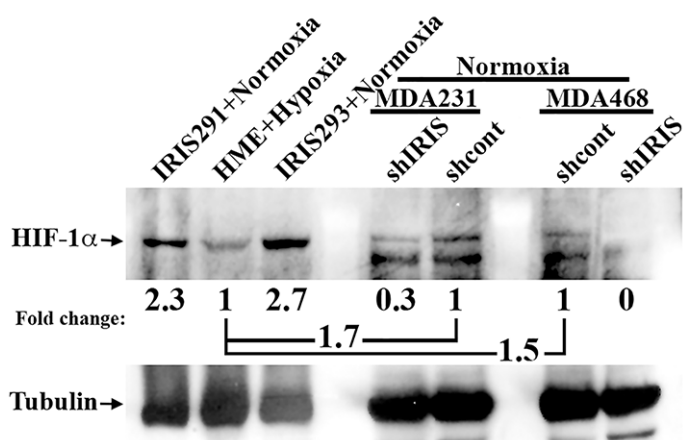

**Supplementary Figure 5:** Expression of HIF-1 $\alpha$  in hypoxic naïve HME and normoxic IRIS291 or IRIS293, as well as normoxic MDA-MB-231, or MDA-MB-468 cells expressing control or IRIS shRNA.

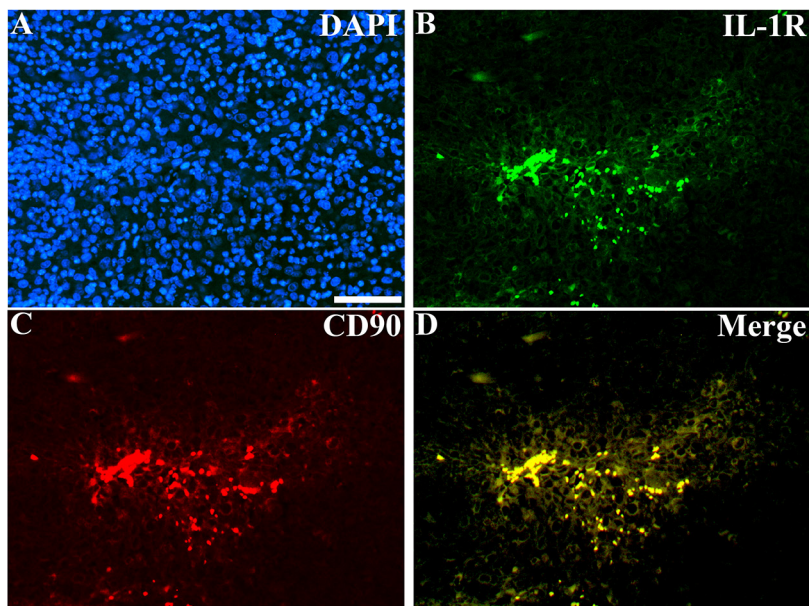

**Supplementary Figure 6:** Staining of IRIS293 tumor sections with DAPI (A), IL-1R (B) and the MSC marker CD90 (C). (D) Shows merged images. Scale bars: 50 $\mu$ m in A-D.

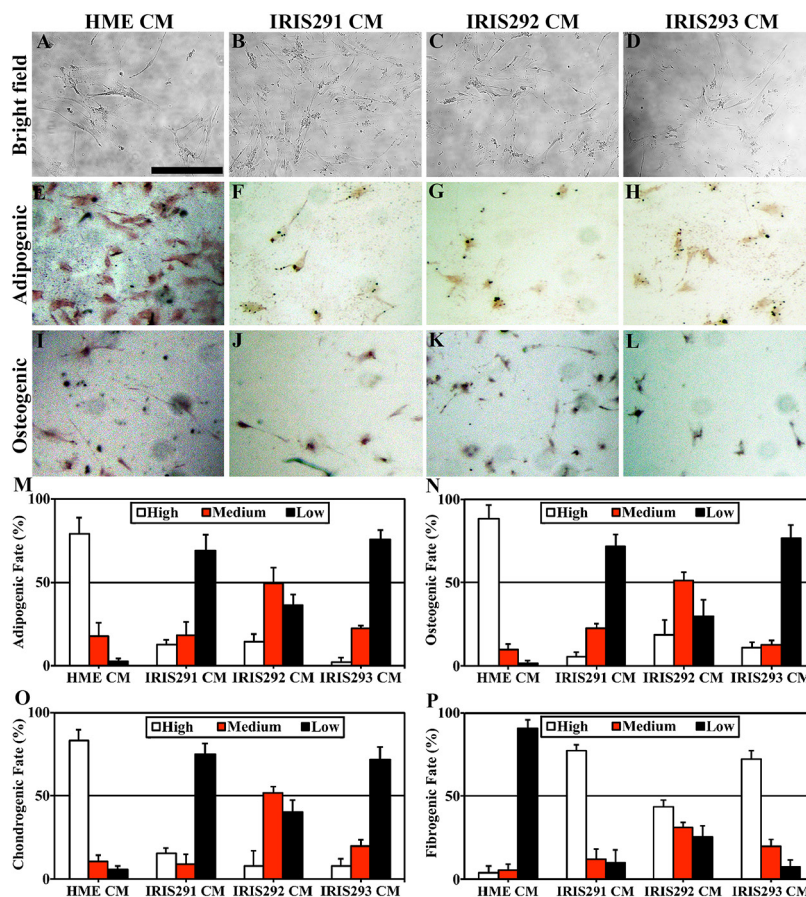

**Supplementary Figure 7: Multi-lineage differentiation staining of MSCs.** (A-D) Bright field microscopy, (E-H) Oil Red O adipogenic staining, and (I-L) Alizarin osteogenic staining for MSCs grown for 7 days in CM from naïve HME, IRIS291, IRIS292 or IRIS293 cells. (M-P) Percentage of MSCs showing high, medium, or low intensity staining for the different lineages dye following exposure to indicated CM for 7 days. Scale bars, 10µm in A-L.

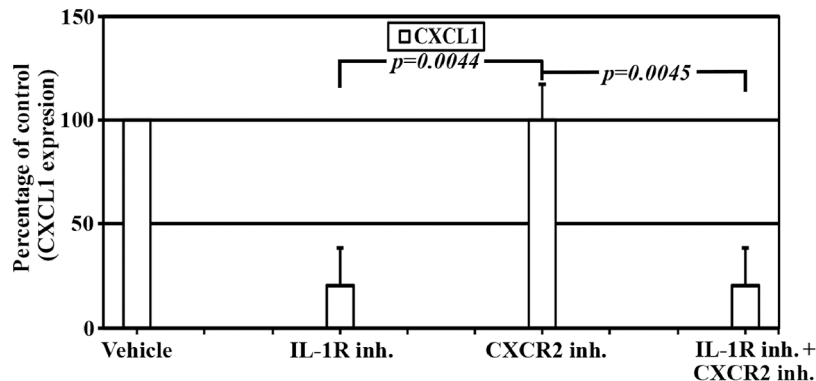

**Supplementary Figure 8: Percentage CXCL1 protein expression in vehicle, IL-1R inhibitor, CXCR2 inhibitor, or both drugs treated tumors.**

**Supplementary Table 1: List of antibodies used in the study and their sources.**

| Antibody                                    | Species    | Catalog no.  | Company                                     |
|---------------------------------------------|------------|--------------|---------------------------------------------|
| IRIS                                        | Mouse      | -            | Developed in our lab                        |
| AKT (S <sup>473</sup> )                     | Rabbit     | 4060         | Cell Signaling Inc. (Danvers, MA, USA)      |
| EGFR                                        | Rabbit     | 9922         | Cell Signaling Inc.                         |
| p-ERK (T <sup>202</sup> /Y <sup>204</sup> ) | Rabbit     | 4370         | Cell Signaling Inc.                         |
| p-p38 (T <sup>180</sup> /Y <sup>182</sup> ) | Rabbit     | 9211         | Cell Signaling Inc.                         |
| Slug (C19G7)                                | Rabbit     | 9585         | Cell Signaling Inc.                         |
| Sox2 (D6D9)                                 | Rabbit     | 3579         | Cell Signaling Inc.                         |
| CK17                                        | Rabbit     | ab51056      | Abcam Inc. (Cambridge, MA, USA)             |
| $\gamma$ -Tubulin                           | Rabbit     | ab11321      | Abcam Inc.                                  |
| MRP8 (S100A8)                               | Rabbit     | ab92331      | Abcam Inc.                                  |
| RAGE (EPR12206)                             | Rabbit     | ab172473     | Abcam Inc.                                  |
| VEGFR2                                      | Rabbit     | ab2349       | Abcam Inc.                                  |
| CCR2                                        | Rabbit     | ab155321     | Abcam Inc.                                  |
| IL-1RA                                      | Rabbit     | ab2573       | Abcam Inc.                                  |
| Integrin beta 1/CD29                        | Rat        | ab95623      | Abcam Inc.                                  |
| CD31                                        | Rat        | ab56299      | Abcam Inc.                                  |
| CD90/Thy1                                   | Rat        | ab3105       | Abcam Inc.                                  |
| F4/80 (CI:A3-1)                             | Rat        | ab6640       | Abcam Inc.                                  |
| CXCR1                                       | Rabbit     | ab137351     | Abcam Inc.                                  |
| CXCR2                                       | Mouse      | ab24963      | Abcam Inc.                                  |
| CK5/6 (D5/16 B4)                            | Mouse      | ab17133      | Abcam Inc.                                  |
| CK5                                         | Guinea pig | ab1941135    | Abcam Inc.                                  |
| Twist (Twist2C1a)                           | Mouse      | ab50887      | Abcam Inc.                                  |
| VEGF (VG-1)                                 | Mouse      | ab1316       | Abcam Inc.                                  |
| CXCL1                                       | Rabbit     | bs-0863R     | Bioss Inc (Woburn, MA, USA)                 |
| CCL2                                        | Mouse      | MAB679       | R&D Systems, Minneapolis, MN, USA           |
| Cortactin                                   | Mouse      | 610049       | BD Biosciences, (San Jose, CA, USA)         |
| N-cadherin                                  | Mouse      | 610920       | BD Biosciences                              |
| IL-8                                        | Mouse      | 554717       | BD Biosciences                              |
| IL-1 $\beta$                                | Rabbit     | P420B        | Thermo Fisher Scientific (Waltham, MA, USA) |
| NF- $\kappa$ B/p65                          | Mouse      | IMG-150A     | Imgenex (San Diego, CA, USA)                |
| Actin                                       | Mouse      | CP01         | Calbiochem (San Diego, CA, USA)             |
| Vimentin/LN6                                | Mouse      | (Ab-1, IF01) | Calbiochem                                  |
| Vimentin                                    | Rabbit     | Ab45939      | Abcam Inc.                                  |

**Supplementary Table 2: List of siRNAs used in the study and their sources.**

| siRNA                                          | Catalog no. | Company                                     |
|------------------------------------------------|-------------|---------------------------------------------|
| HIF-1 $\alpha$ siRNA (h)                       | AM16708     | Thermo Fisher Scientific (Waltham, MA, USA) |
| Silencer® Firefly Luciferase (GL2 + GL3) siRNA | AM4629      |                                             |

**Supplementary Table 3: Sequences of primers used in qRT/PCR in the current studies.**

| Gene           | Primers sequence                                                                  |
|----------------|-----------------------------------------------------------------------------------|
| <i>CXCL1</i>   | Forward: 5'-AACCGAAGTCATAGCCACAC-3'<br>Reverse: 5'-GTTGGATTTGTCAGTTCAGC-3'        |
| <i>IL-12</i>   | Forward: 5'-AAAGGACATCTGCGAGGAAAGTTC-3'<br>Reverse: 5'-CGAGGTGAGGTGCGTTTATGC-3'   |
| <i>CXCL-10</i> | Forward: 5'-GAAAGCAGTTAGCAAGGAAAGGTC-3'<br>Reverse: 5'-ATGTAGGGAAGTGATGGGAGAGG-3' |
| <i>CCL-17</i>  | Forward: 5'-CGGGACTACCTGGGACCTC-3'<br>Reverse: 5'-CCTCACTGTGGCTCTTCTTCG-3'        |
| <i>CCL-18</i>  | Forward: 5'-ATGGCCCTCTGCTCCTGT-3'<br>Reverse: 5'-AATCTGCCAGGAGGTATAGACG-3'        |
| <i>GAPDH</i>   | Forward: 5'-AATGGAAATCCCATCACCATCT-3'<br>Reverse: 5'-CGCCCCACTTGATTTTGG-3'        |

**Supplementary Table 4: Staining protocol for MSC differentiation lineage for MSCs grown for 7 days in CM from HME or IRISOE cells.**

| Lineage type         | Staining protocol                 |
|----------------------|-----------------------------------|
| Adipogenic lineage   | Oil-Red O (Sigma)                 |
| Osteogenic lineage   | Alizarin Red S (Sigma)            |
| Chondrogenic lineage | Alcian blue (Sigma)               |
| Fibrogenic lineage   | PicroSirius/Direct red 80 (Sigma) |
